# Supplementary material for: Pillar arrays as tunable interfacial barriers for microphysiological systems
Source: PubMed Central journal article supplement (PMC11774470; doi:10.21203/rs.3.rs-5776581/v1), 2025-01-16
Supplement: NIHPPrs5776581v1-supplement-1.pdf [file NIHPPrs5776581v1-supplement-1.pdf]

1 **SUPPLEMENTARY**

2

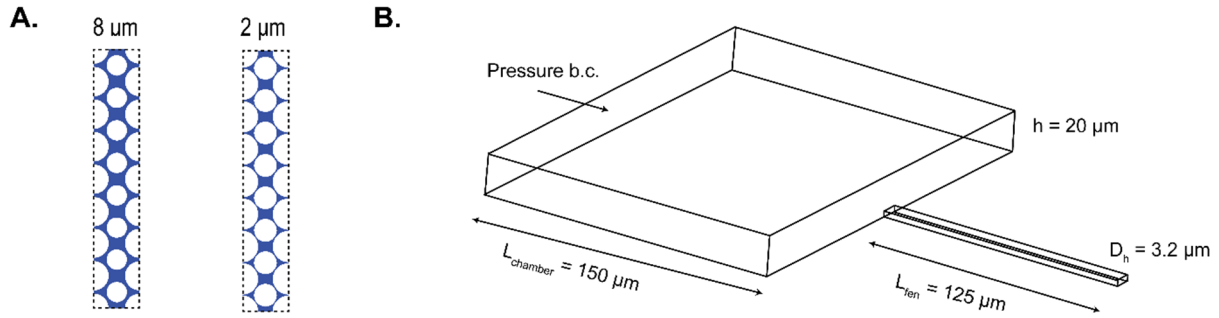

**Figure S1:** (A) Variation of pore size as defined by the distance between the pillars changes the porosity of the pillar-based fenestration layer. Shown here are two interfaces created in a 125 μm x 708 μm rectangle with 8 μm and 2 μm pore sizes and porosity of 31% and 19%, respectively. (B) A single microchannel-based fenestra finite element model was used to simulate the movement of the air-water interface across the microfluidic barrier to quantify burst pressure.

3  
4

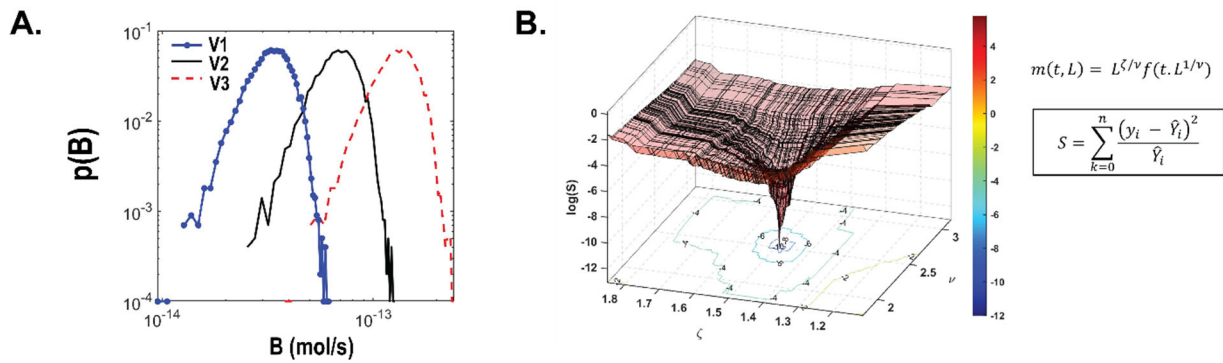

**Figure S2:** (A) Tissue OCR B probability distributions obtained for V1, V2, and V3 using FEM PoM method. (B) Differential evolution approach was used to obtain parameters for probability collapse. Show here is the estimation of parameters  $\nu$  and  $\zeta$  for the collapse of probability distributions of  $m$  to estimate the scaling with respect to  $L$  and  $t$ , described by a scaling function  $f$ .

5  
6  
7  
8  
9  
10  
11  
12  
13  
14  
15  
16  
17
